# Supplementary material for: Human trophoblast stem cell self-renewal and differentiation: Role of decorin
Source: PubMed Central journal article supplement (PMC5997742; doi:10.1038/s41598-018-27119-4), 2018-06-12
Supplement: 41598_2018_27119_MOESM1_ESM.pdf [file 41598_2018_27119_MOESM1_ESM.pdf]

Human trophoblast stem cell self-renewal and differentiation: Role of decorin

Pinki Nandi<sup>1</sup>, Hyobin Lim<sup>1</sup>, Eloy Jose Torres-Garcia<sup>1</sup>, Peeyush K Lala<sup>1,2,3,\*</sup>

<sup>1</sup>Department of Anatomy and Cell Biology, Schulich School of Medicine and Dentistry, University of Western Ontario, London, Ontario, Canada.

<sup>2</sup> Department of Oncology, Schulich School of Medicine and Dentistry, University of Western Ontario, London, Ontario, Canada.

<sup>3</sup> Associate Scientist, Children's Health Research Institute, Schulich School of Medicine and Dentistry, University of Western Ontario, London, Ontario, Canada.

\*Corresponding Author (Correspondence to [pklala@uwo.ca](mailto:pklala@uwo.ca))

Supplementary Figure 1

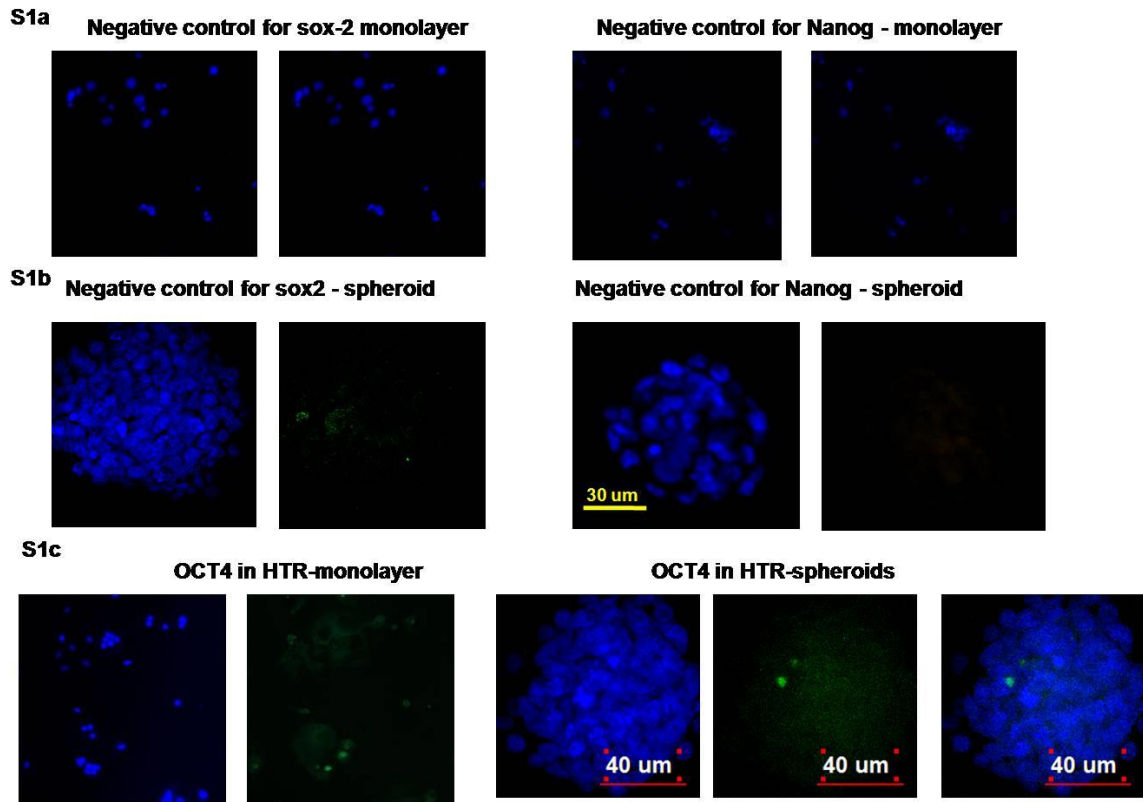

**Figure legend for supplementary figure 1:** S1a shows the negative controls for SOX2 (left panel) and NANOG (right panel) in HTR-monolayer. Figure S1b shows the negative controls for SOX2 (left panel) and NANOG (right panel) in HTR-spheroids. Figure S1c shows staining for OCT4 in HTR monolayer and spheroids.

Supplementary Figure 2

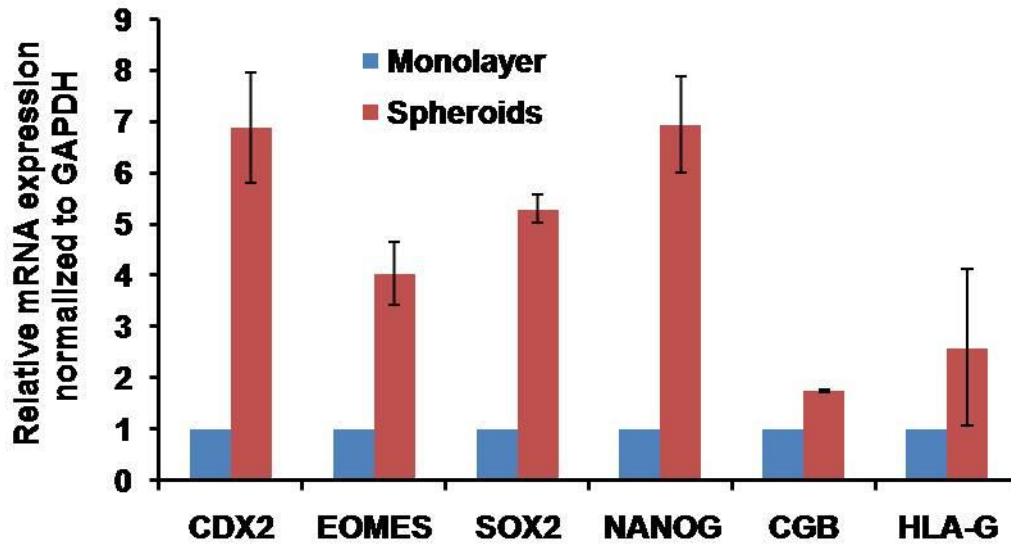

**Figure legend for supplementary figure 2:** qRT-PCR analysis of ES (SOX2, NANOG), TS (CDX2, EOMES) and differentiation markers (CGB and HLA-G) in a population of pooled HTR-spheroids.
